# Supplementary material for: Aggregation of ice-nucleating macromolecules from Betula pendula pollen determines ice nucleation efficiency
Source: Copernicus journal article supplement (doi:10.5194/egusphere-2024-752), 2024-04-29
Supplement: Supplementary file 1 [file egusphere-2024-752-supplement.pdf]

# Supplement for Aggregation of ice-nucleating macromolecules from *Betula pendula* pollen determines ice nucleation efficiency.

Florian Wieland<sup>1,2</sup>, Nadine Bothen<sup>2</sup>, Ralph Schwidetzky<sup>3</sup>, Teresa M. Seifried<sup>1,4</sup>, Paul Bieber<sup>1,4</sup>, Ulrich Pöschl<sup>2</sup>, Konrad Meister<sup>3,5</sup>, Mischa Bonn<sup>3</sup>, Janine Fröhlich-Nowoisky<sup>2</sup>, Hinrich Grothe<sup>1</sup>

<sup>1</sup>Institute of Materials Chemistry, TU Wien, Vienna, 1060, Austria

<sup>2</sup>Multiphase Chemistry Department, Max Planck Institute for Chemistry, Mainz, 55128, Germany

<sup>3</sup>Molecular Spectroscopy Department, Max Planck Institute for Polymer Research, Mainz, 55128, Germany

<sup>4</sup>Department of Chemistry, University of British Columbia, Vancouver, BC V6T 1Z1, Canada

<sup>5</sup>Department of Chemistry and Biochemistry, Boise State University, Boise, ID 83725

Correspondence to: H. Grothe ([hinrich.grothe@tuwien.ac.at](mailto:hinrich.grothe@tuwien.ac.at))

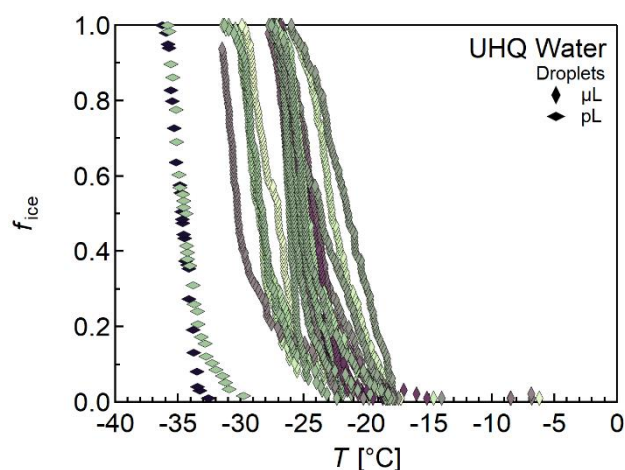

**Figure S 1.** Ice nucleation activity of background measurement for the  $\mu\text{L}$ - and the  $\text{pL}$ -droplet assay. The background for the  $\mu\text{L}$ -droplet assay starts as early as  $-15^\circ\text{C}$  (with some single droplets starting even higher), but most blanks froze between  $-20^\circ\text{C}$  and  $-30^\circ\text{C}$ . The  $\text{pL}$ -droplet background starts at about  $-33^\circ\text{C}$ , with a few droplets freezing at higher temperatures.

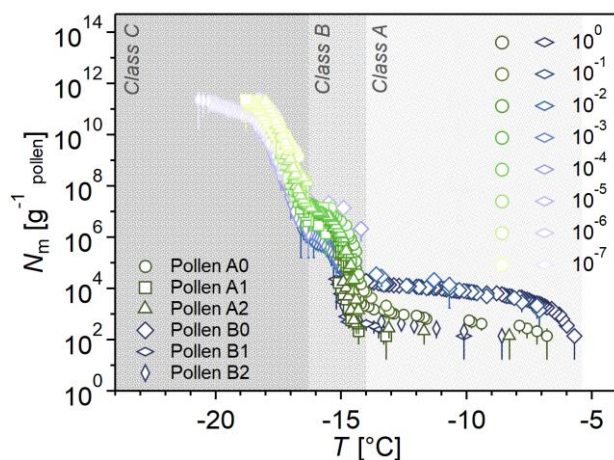

**Figure S 2.** Freezing spectra of INMs from *Betula pendula* pollen. Cumulative number  $N_m(T)$  of INMs per gram *Betula pendula* pollen. Pollen from different growing regions: pollen A from the Czech Republic (Pharmallerga), pollen B from Slovakia (Pharmallerga). Ice nucleation activity above  $-15^\circ\text{C}$  varies independently of the growing region. The legend on the left indicates the dilution (e.g.,  $10^{-1}$  equals a 1:10 dilution, one part sample to nine parts ultra-high quality (UHQ) water).

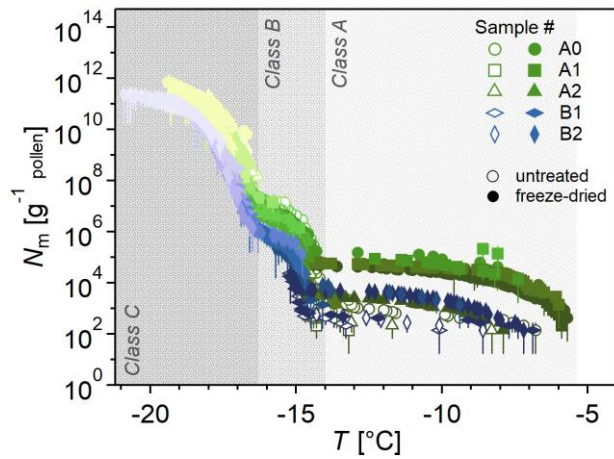

**Figure S 3. Effect of freeze drying (experiment replications).** Cumulative number  $N_m(T)$  of INMs per gram *Betula pendula* pollen. The effect on ice nucleation activity varies from experiment to experiment, but ice nucleation activity always increases, and mostly, ice nucleation activity  $> -15^\circ\text{C}$  is affected. Solid symbols mark untreated samples (non-freeze-dried), and hollow symbols mark freeze-dried samples. Green colors represent pollen A (Czech Republic), and Blue represents pollen B (Slovakia).

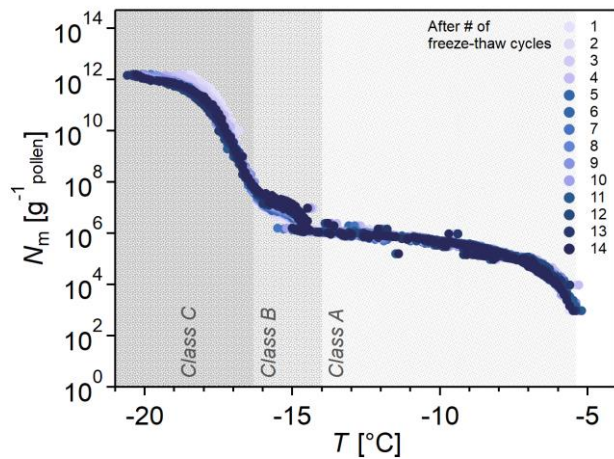

**Figure S 4. Effect of freeze-thaw cycles (whole freezing spectrum).** Cumulative number  $N_m(T)$  of INMs per gram *Betula pendula* pollen. In addition to Fehler! Verweisquelle konnte nicht gefunden werden..

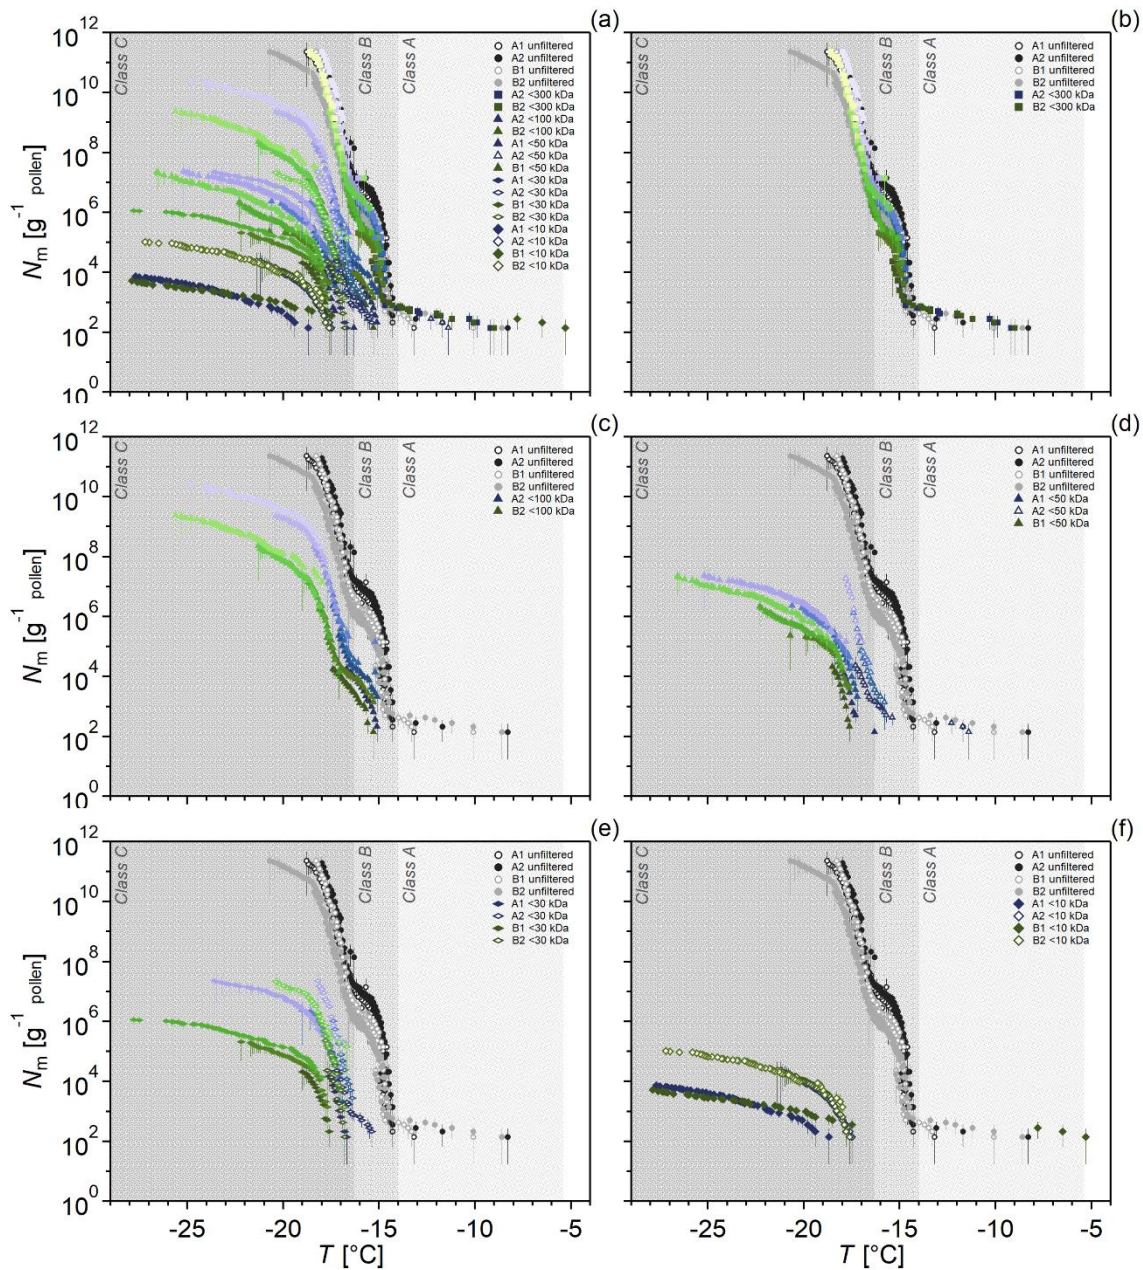

**Figure S 5. Size-selective filtrations (experiment replications).** Cumulative number  $N_m(T)$  of INMs per gram *Betula pendula* pollen. (a) Showing all measurements, this includes filtrations series from two different *Betula pendula* pollen (A from the Czech Republic in blue tones, B from Slovakia in green tones) and two different BPWW batches each (1 and 2). The unfiltered samples are shown in black (A) and grey (B) in all plots. (b) – (d) Comparing unfiltered (220 nm filtered during BPWW preparation) samples to the 300 kDa (b), 100 kDa (c), 50 kDa (d), 30 kDa (e), and 10 kDa (f) filtrates. The 300 kDa and 100 kDa filtrations were only replicated once (A2 and B2) since the effect on the sample is only minor. When measuring sample B2 50 kDa filtrate, an error occurred.

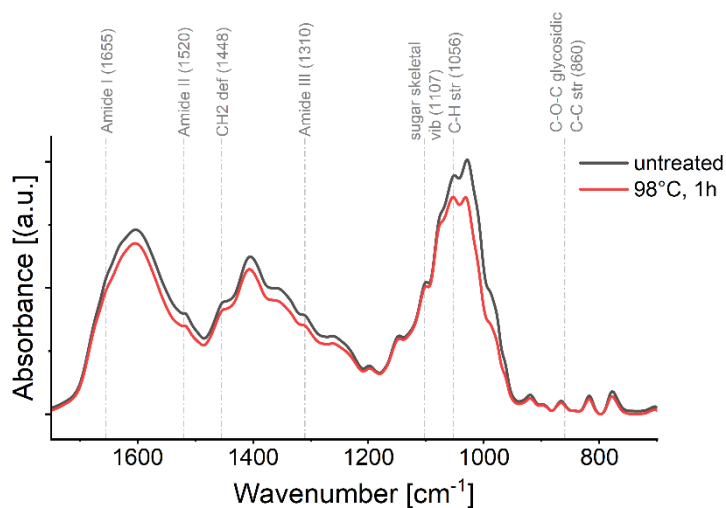

**Figure S 6. Infrared spectrum of untreated and heat treated BPWW.** A selection of typical protein and polysaccharide bands has been marked (Pummer et al., 2013a).

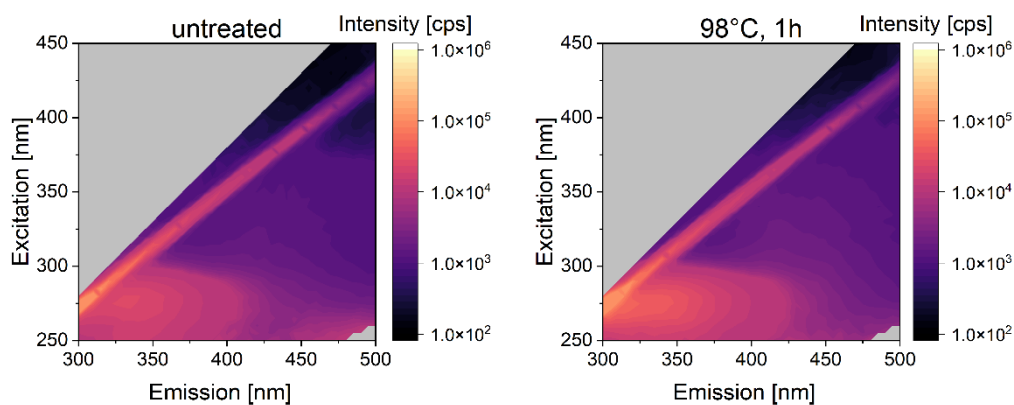

**Figure S 7. Fluorescence excitation-emission measurement of untreated and heat treated BPWW.** The main signals are at excitation  $\sim 275$  nm and emission at  $\sim 330$  nm, indicating aromatic amino acids' presence. The diagonal signal is the Raman scattering caused by the solvent (water).
